# 1 BiSCoT: Improving large eukaryotic 2 genome assemblies with optical maps

3 Benjamin Istace<sup>1</sup>, Caroline Belser<sup>1</sup>, and Jean-Marc Aury<sup>1</sup>

4 <sup>1</sup>Génomique Métabolique, Genoscope, Institut François Jacob, CEA, CNRS, Univ Evry,  
5 Université Paris-Saclay, 91057 Evry, France

6 Corresponding author:

7 Benjamin Istace<sup>1</sup>

8 Email address: [bistace@genoscope.cns.fr](mailto:bistace@genoscope.cns.fr)

## 9 ABSTRACT

10 **Motivation.** Long read sequencing and Bionano Genomics optical maps are two techniques that, when  
11 used together, make it possible to reconstruct entire chromosome or chromosome arms structure.  
12 However, the existing tools are often too conservative and organization of contigs into scaffolds is not  
13 always optimal.

14 **Results.** We developed BiSCoT (Bionano SCaffolding COrrrection Tool), a tool that post-processes files  
15 generated during a Bionano scaffolding in order to produce an assembly of greater contiguity and quality.  
16 BiSCoT was tested on a human genome and four publicly available plant genomes sequenced with  
17 Nanopore long reads and improved significantly the contiguity and quality of the assemblies. BiSCoT  
18 generates a fasta file of the assembly as well as an AGP file which describes the new organization of the  
19 input assembly.

20 **Availability.** BiSCoT and improved assemblies are freely available on Github at  
21 <http://www.genoscope.cns.fr/biscot> and Pypi at <https://pypi.org/project/biscot/>.

## 22 INTRODUCTION

23 Assembling large and repetitive genomes, such as plant genomes, is a challenging field in bioinformatics.  
24 The appearance of short reads technologies several years ago improved considerably the number of  
25 genomes publicly available. However, a high proportion of them are still fragmented and few represent  
26 the chromosome organization of the genome. Recently, long reads sequencing techniques, like Oxford  
27 Nanopore Technologies and Pacific Biosciences, were introduced to improve the contiguity of assemblies,  
28 by sequencing DNA molecules that can range from a few kilobases to more than a megabase in size  
29 (Istace et al. (2017); Schmidt et al. (2017); Kim et al. (2019); Shafin et al. (2019)). Nevertheless and even  
30 if the assemblies were greatly improved, the chromosome-level organization of the sequenced genome  
31 cannot be deciphered in a majority of cases. In 2017, Bionano Genomics launched its Saphyr system  
32 which was able to generate optical maps of a genome, by using the distribution of enzymatic labelling  
33 sites. These maps were used to orient and order contigs into scaffolds but the real improvement came  
34 in 2018, when Bionano Genomics introduced their Direct Label and Stain (DLS) technology that was  
35 able to produce genome maps at the chromosome-level with a N50 several times higher than previously  
36 (Belser et al. (2018); Formenti et al. (2018); Hu et al. (2019)).

37  
38 However, scaffolds generated with the tool provided by Bionano Genomics do not reach optimal  
39 contiguity. Indeed, when two contigs  $C_1$  and  $C_2$  are found to share labels, one could expect that the tool  
40 would merge the two sequences at the shared site. Instead, the software chooses a conservative approach  
41 and outputs the sequence of  $C_1$  followed by a 13-Ns gap and then the  $C_2$  sequence, thus duplicating the  
42 region that is shared by the two contigs (Figure 1 case 1 and 2) and in numerous cases, these duplicated  
43 regions could reach several kilobases. As an example, on the human genome we used to evaluate BiSCoT  
44 (see Results), we could detect 515 of those regions, affecting 16 genes and corresponding to around  
45 24.5Mb of duplicated sequences, the longest being 237kb in size. These duplicated regions affect the  
46 contiguity and have to be corrected as they can be problematic for downstream analyses, like copy number

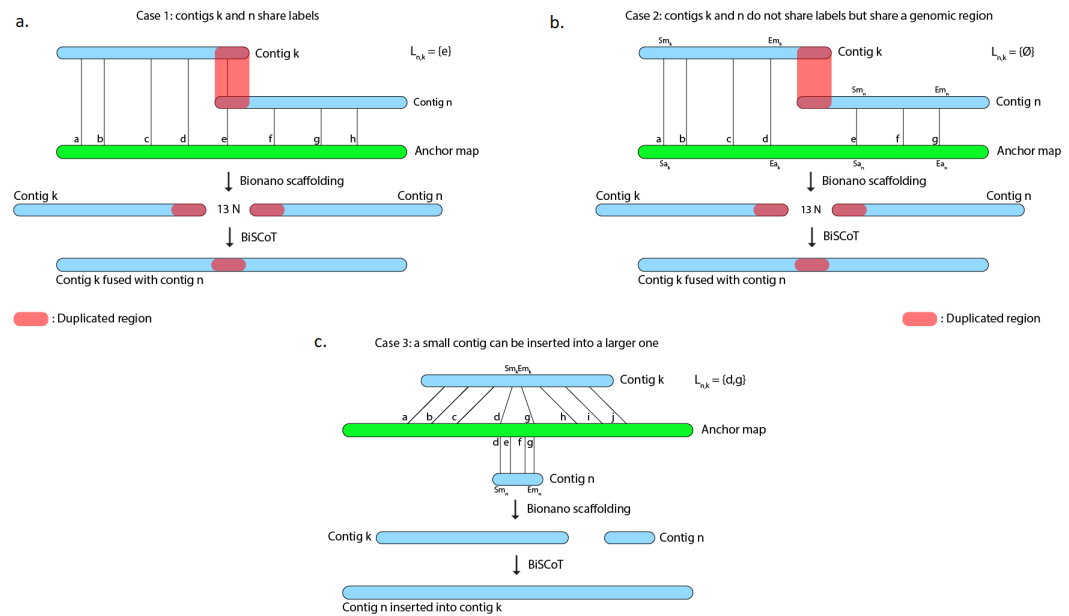

**Figure 1.** The Bionano scaffolding tool does not merge contigs even if they share labels. Instead, it inserts 13 N's gap between contigs, thus artificially duplicating the shared region. **a.** BiSCoT merges contigs that share enzymatic labelling sites. **b.** If contigs do not share labels but share a genomic region, BiSCoT attempts to merge them by aligning the borders of the contigs. **c.** The Bionano scaffolding tool does not handle cases where contigs can be inserted into others. BiSCoT attempts to merge the inserted map with the one containing it if they share labels.

47 variation studies. They originate from overlaps that are not fused in the input assembly and usually  
 48 correspond to allelic duplications. In addition, contigs can sometimes be inserted into other contigs, these  
 49 cases are not handled by the Bionano scaffolding tool that discards the inserted contigs (Figure 1 case 3).

50

51 We developed BiSCoT, a python script that examines data generated during a previous Bionano  
 52 scaffolding and merges contigs separated by a 13-Ns gap if needed. BiSCoT also re-evaluates gap sizes  
 53 and searches for an alignment between two contigs if the gap size is inferior to 1,000 nucleotides. BiSCoT  
 54 is therefore not a traditional scaffolder since it can only be used to improve an existing scaffolding, based  
 55 on an optical map.

## 56 METHODS

### 57 Mandatory files loading

58 During the scaffolding, the Bionano scaffolder generates a visual representation of the hybrid scaffolds  
 59 that is called an 'anchor'. It also generates one '.key' file, which describes the mapping between map  
 60 identifiers and contig names, several CMAP files, which contain the position of enzymatic labelling sites  
 61 on contig maps and on the anchor, and a XMAP file, that describes the alignment between a contig map  
 62 and an anchor.

63 BiSCoT first loads the contigs into memory based on the key file. Then, the anchor CMAP file and contig  
 64 CMAP files are loaded into memory. Finally, the XMAP file is parsed and loaded.

### 65 Scaffolding

66 Alignments of contigs onto anchors contained in the XMAP file are first sorted by their starting position  
 67 on the anchor. Then, alignments on one anchor are parsed by pairs of adjacent contigs, i.e alignment of  
 68 contig  $C_k$  is examined at the same time as contig  $C_n$ , with  $C_k$  aligned before  $C_n$  on the anchor. Aligned  
 69 anchor labels are extracted from these alignments and a list of shared labels  $L_{n,k}$  is built. For the following  
 70 cases, we suppose  $C_k$  and  $C_n$  to be aligned on the forward strand (Figure 1).

71 **Case 1: contig maps share at least one anchor label**

72 The last label  $l$  from  $L_{n,k}$  is extracted and the position  $P_l$  of  $l$  on both contigs  $C_k$  and  $C_n$  is recovered from  
73 the CMAP files. In the resulting scaffold, the sequence of  $C_k$  will be included up to the  $P_l$  position and the  
74 sequence of  $C_n$  will be included from the  $P_l$  position. In this case, the gap is removed, both contigs  $C_k$  and  
75  $C_n$  are fused and BiSCoT generates a single contig instead of two contigs initially separated by a gap in  
76 the input assembly.

77 **Case 2: contig maps do not share anchor labels**

78 Let  $Size_k$  be the size of the contig  $C_k$ ,  $Sm_k$  and  $Em_k$  the start and end of an alignment on a contig map  
79 and  $Sa_k$  and  $Ea_k$  the corresponding coordinates on the anchor. The number  $n$  of bases between the last  
80 aligned label of  $C_k$  and the first aligned label of  $C_n$  is then:

$$n = Sa_n - Ea_k \quad (1)$$

81 We then have to subtract the part  $d_k$  of  $C_k$  after the last aligned label of  $C_k$  and the part  $d_n$  of  $C_n$  before the  
82 first aligned label of  $C_n$ :

$$d_k = Size_k - Em_k \quad (2)$$

$$d_n = Sm_n \quad (3)$$

83 Finally, we can compute the gap size  $g$  with:

$$g = n - d_k - d_n \quad (4)$$

84 If  $g \leq 1000$ , a BLAT(Kent (2002)) alignment of the last 30kb of  $C_k$  is launched against the first 30kb of  
85  $C_n$ . If an alignment is found and if its score is higher than 5,000,  $C_k$  and  $C_n$  are merged at the starting  
86 position of the alignment and, as in case1, BiSCoT generates a single contig instead of two contigs initially  
87 separated by a gap in the input assembly. Otherwise, a number  $g$  of Ns is inserted between  $C_k$  and  $C_n$ .

88 **Case 3: insertion of small contigs**

89 Let  $Sm_k$  and  $Em_k$  the start and end of an alignment on a contig map. If  $[Sm_n, Em_n] \subset [Sm_k, Em_k]$ , then  
90 the left-most shared label identifier  $l_l$  and right-most shared label identifier  $l_r$  are extracted. If  $C_n$  has  
91 more of its labels mapped in this region than  $C_k$ , the sequence of  $C_n$  will be inserted between  $l_l$  and  $l_r$  in  
92 the scaffolds. Otherwise, the sequence of  $C_k$  remains unchanged and  $C_n$  will be included as a singleton  
93 sequence in the scaffolds file.

94  
95 Finally, if an Illumina polishing step was done before or after Bionano scaffolding, we recommend  
96 doing one additional round of polishing using Illumina reads after BiSCoT has been applied. Indeed,  
97 short reads tend to be aligned only against one copy of the duplicated regions, leaving the other copy  
98 unpolished.

99 **RESULTS AND DISCUSSIONS**

100 **Validation on simulated data**

101 In order to simulate a genome assembly, we downloaded the chromosome 1 of the GRCh38.p12 human  
102 reference genome and fragmented it to create contigs. We generated 120 contigs with an N50 size of  
103 2.4Mb and a cumulative size of 231Mb. Contigs were generated with either overlaps or gaps between  
104 them. We introduced 50 gaps with a mean length of 50kb, the smallest being 3.4kb long and the largest  
105 99.6kb long, and 50 overlaps with a mean size of 44kb, the smallest being 278b long and the largest  
106 98.6kb long. We also generated five contigs, with an N50 of 254kb, that were subsequences of larger  
107 contigs, to simulate contained contigs.

108 Then, we used these contigs and Bionano DLE and BspQI optical maps available on the Bionano  
109 Genomics website as input to the Bionano scaffolder. We gave the results of this scaffolding to BiS-  
110 CoT and aligned all assemblies to the chromosome 1 reference using Quast (Gurevich et al. (2013), v5.0.2).

111  
112 BiSCoT was able to resolve 39 overlaps out of the 50 we introduced (Supplementary Table 1), 31  
113 using shared labels and 8 using a Blat alignment. The 11 remaining overlaps could not be resolved

|                   | Nanopore contigs   | Bionano          |               | BiSCoT             |               |
|-------------------|--------------------|------------------|---------------|--------------------|---------------|
|                   |                    | Contigs          | Scaffolds     | Contigs            | Scaffolds     |
| Cumulative size   | 2,818,937,673      | 2,818,997,568    | 2,878,230,106 | 2,810,480,725      | 2,868,077,379 |
| N50               | 11,821,944         | 10,566,783       | 86,858,024    | <b>12,894,141</b>  | 86,833,728    |
| L50               | 67                 | 71               | 14            | <b>64</b>          | 14            |
| N90               | 2,143,851          | 1,863,173        | 26,054,782    | <b>2,321,940</b>   | 26,037,000    |
| L90               | 280                | 301              | 36            | <b>254</b>         | 36            |
| auN*              | 15,164,719         | 14,547,428       | 82,760,251    | <b>15,977,835</b>  | 82,474,548    |
| # Ns              | 0                  | 0                | 59,232,538    | 0                  | 57,596,654    |
| NGA50             | 5,794,944          | 5,729,014        | 10,816,842    | <b>6,360,576</b>   | 11,713,900    |
| NGA75             | 1,511,206          | 1,495,174        | 2,701,541     | <b>1,596,102</b>   | 2,938,187     |
| # misassemblies   | 1,356              | 1,299            | 1,602         | <b>1,278</b>       | 1,515         |
| Complete BUSCOs   | <b>235 (92.2%)</b> | 234 (91.8%)      | 231 (90.6%)   | <b>235 (92.2%)</b> | 231 (90.6%)   |
| Duplicated BUSCOs | 5 (2.0%)           | <b>4 (1.6%)</b>  | 4 (1.6%)      | <b>4 (1.6%)</b>    | 4 (1.6%)      |
| Missing BUSCOs    | 11 (4.3%)          | <b>10 (3.9%)</b> | 13 (5.1%)     | <b>10 (3.9%)</b>   | 13 (5.1%)     |

(\*) auN is a new metric to measure assembly contiguity (Li (2020))

**Table 1.** Metrics of the NA12878 scaffolds and contigs before or after BiSCoT treatment. Bold formatting indicates the best scoring assembly among contigs.

114 due to contigs not sharing enough labels or the overlap being too small to produce an alignment of  
 115 sufficient confidence. BiSCoT was also able to integrate all contained contigs back to their original place  
 116 in the assembly. Furthermore, BiSCoT did not close any of the real gaps introduced during the assembly  
 117 generation.

118 Regarding assembly metrics (Supplementary Table 2), The N50 decreased by 1.4% in scaffolds and  
 119 increased by 22% in contigs. The number of Ns in scaffolds decreased from 20.7Mb to 20.4Mb. Moreover,  
 120 the number of misassemblies decreased by 68% after applying BiSCoT and the duplication ratio estimated  
 121 by Quast decreased from 1.026 in Bionano scaffolds to 1.021 in BiSCoT scaffolds.

122 In order to estimate the accuracy of gap sizes, we compared the gap sizes we introduced in the input  
 123 assembly to the ones that were estimated using optical maps (Supplementary Figure 1). We found that  
 124 estimated gap sizes were very close to the reality, with a mean scaled absolute error of 0.8%.

## 125 Validation on real data

126 We downloaded genome assemblies for which a DLE optical map was available: the NA12878 human  
 127 genome (Jain et al. (2018)), *Brassica oleracea* HDEM (PRJEB26621, Belser et al. (2018)), *Brassica rapa*  
 128 Z1 (PRJEB26620, Belser et al. (2018)) and *Musa schizocarpa* (PRJEB26661, Belser et al. (2018)) and  
 129 *Sorghum bicolor* Tx430 (PRJNA472170, Deschamps et al. (2018)).

130 The QUAST and BUSCO (Simão et al. (2015), v4.0.5) tools were used respectively to evaluate the number  
 131 of misassemblies to the GRCh38.p12 human reference genome and the number of conserved genes among  
 132 eukaryotes.

133 In all cases, we first used the Bionano workflow to scaffold the draft assembly and launched BiSCoT  
 134 using the files generated by the Bionano tools (Table 1, Supplementary Table 3, 4, 5 and 6). The output of  
 135 the Bionano workflow and BiSCoT are scaffolds, but we generated a contig file for each assembly by  
 136 splitting each scaffold at every position with at least one N.

138 Concerning the NA12878 genome, we could detect 515 overlapping regions with a mean size of 47kb  
 139 and representing in total 24.5Mb of duplicated sequences. Among these 515 regions, 499 were corrected  
 140 by BiSCoT using either shared labels (113 regions) or a BLAT alignment (386 regions) when no shared  
 141 labels were found.

142 Globally, the contig NX and NGAX metrics increased drastically: the contigs NGA50 of NA12878  
 143 increased by around 10%, going from 5.8Mb to 6.3Mb. The scaffolds NGAX metrics also increased: the  
 144 scaffolds NGA50 increased from 10.8Mb in Bionano scaffolds to 11.7Mb in BiSCoT scaffolds. Moreover,  
 145 the number of Ns decreased marginally and the number of complete eukaryotic genes stayed the same in  
 146 scaffolds. More importantly, when aligning the assemblies against the reference genome, we could detect  
 147 a decrease in the number of mis-assemblies going from 1,602 in Bionano scaffolds to 1,515 in BiSCoT

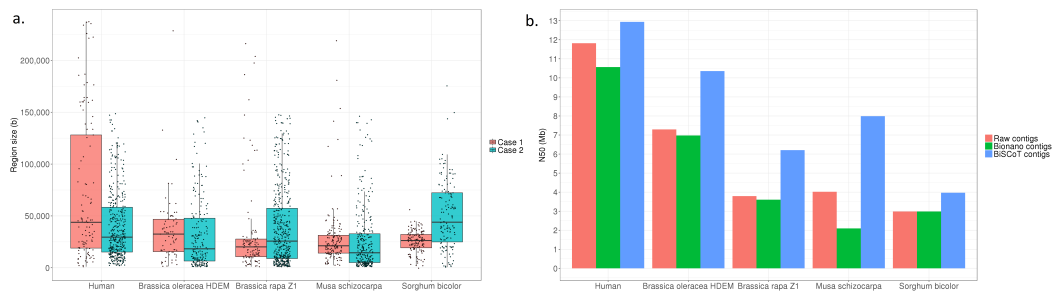

**Figure 2. a.** Distribution of the sizes of overlapping regions in the raw assemblies. Detection was done using either Bionano labels (Case 1) or a BLAT alignment (Case 2). **b.** N50 contigs of raw assemblies and assemblies before or after BiSCoT treatment.

148 scaffolds. The same kind of results were observed in the four plant genomes with a slight decrease in  
149 scaffolds NX metrics and number of Ns but an increase in contigs NX metrics (Figure 2 and Supplementary  
150 Tables 2, 3, 4 and 5).

## 151 SUMMARY

152 Thanks to the advent of long reads and optical maps technologies, it is now possible to obtain high-  
153 quality chromosome-scale assemblies. However, the official Bionano scaffolding tool does not always  
154 perform optimally when joining two contigs. Indeed, it does not merge two sequences when they share a  
155 genomic region, creating artificial gaps in the assembly. We developed BiSCoT, a tool that corrects these  
156 problematic regions in a prior Bionano scaffolding and showed that it increased significantly contiguity  
157 metrics of the resulting assembly, while preserving its quality.

## 158 ACKNOWLEDGMENTS

159 The authors are grateful to the Bionano Genomics staff for technical help and would also like to thank  
160 the Whole Human Genome Sequencing Project for providing access to the Nanopore human genome  
161 assembly.

## 162 REFERENCES

- 163 Belser, C., Istace, B., Denis, E., Dubarry, M., Baurens, F.-C., Falentin, C., Genete, M., Berrabah,  
164 W., Chèvre, A.-M., Delourme, R., Deniot, G., Denoëud, F., Duffé, P., Engelen, S., Lemainque, A.,  
165 Manzanares-Dauleux, M., Martin, G., Morice, J., Noel, B., Vekemans, X., D’Hont, A., Rousseau-  
166 Gueutin, M., Barbe, V., Cruaud, C., Wincker, P., and Aury, J.-M. (2018). Chromosome-scale assemblies  
167 of plant genomes using nanopore long reads and optical maps. *Nature Plants*, 4(11):879–887.  
168 Deschamps, S., Zhang, Y., Llaca, V., Ye, L., Sanyal, A., King, M., May, G., and Lin, H. (2018). A  
169 chromosome-scale assembly of the sorghum genome using nanopore sequencing and optical mapping.  
170 *Nature Communications*, 9(1):4844.  
171 Formenti, G., Chiara, M., Poveda, L., Francoijs, K.-J., Bonisoli-Alquati, A., Canova, L., Gianfranceschi,  
172 L., Horner, D. S., and Saino, N. (2018). SMRT long reads and Direct Label and Stain optical maps  
173 allow the generation of a high-quality genome assembly for the European barn swallow (*Hirundo  
174 rustica rustica*). *GigaScience*, 8(1). giy142.  
175 Gurevich, A., Saveliev, V., Vyahhi, N., and Tesler, G. (2013). QUASt: quality assessment tool for genome  
176 assemblies. *Bioinformatics*, 29(8):1072–1075.  
177 Hu, L., Xu, Z., Wang, M., Fan, R., Yuan, D., Wu, B., Wu, H., Qin, X., Yan, L., Tan, L., Sim, S., Li,  
178 W., Sasaki, C. A., Daniell, H., Wendel, J. F., Lindsey, K., Zhang, X., Hao, C., and Jin, S. (2019).  
179 The chromosome-scale reference genome of black pepper provides insight into piperine biosynthesis.  
180 *Nature Communications*, 10(1):4702.  
181 Istace, B., Friedrich, A., d’Agata, L., Faye, S., Payen, E., Beluche, O., Caradec, C., Davidas, S., Cruaud,  
182 C., Liti, G., Lemainque, A., Engelen, S., Wincker, P., Schacherer, J., and Aury, J.-M. (2017). De novo

- 183 assembly and population genomic survey of natural yeast isolates with the Oxford Nanopore MinION  
184 sequencer. *GigaScience*, 6(2). giw018.
- 185 Jain, M., Koren, S., Miga, K. H., Quick, J., Rand, A. C., Sasani, T. A., Tyson, J. R., Beggs, A. D., Dilthey,  
186 A. T., Fiddes, I. T., Malla, S., Marriott, H., Nieto, T., O'Grady, J., Olsen, H. E., Pedersen, B. S., Rhie,  
187 A., Richardson, H., Quinlan, A. R., Snutch, T. P., Tee, L., Paten, B., Phillippy, A. M., Simpson, J. T.,  
188 Loman, N. J., and Loose, M. (2018). Nanopore sequencing and assembly of a human genome with  
189 ultra-long reads. *Nature Biotechnology*, 36:338 EP –.
- 190 Kent, W. (2002). Blat—the blast-like alignment tool. *Genome Research*, 12:656–664.
- 191 Kim, H.-S., Jeon, S., Kim, C., Kim, Y. K., Cho, Y. S., Kim, J., Blazyte, A., Manica, A., Lee, S., and Bhak,  
192 J. (2019). Chromosome-scale assembly comparison of the Korean Reference Genome KOREF from  
193 PromethION and PacBio with Hi-C mapping information. *GigaScience*, 8(12). giz125.
- 194 Li, H. (2020). aun: a new metric to measure assembly contiguity.
- 195 Schmidt, M. H.-W., Vogel, A., Denton, A. K., Istace, B., Wormit, A., van de Geest, H., Bolger, M. E.,  
196 Alseekh, S., Maß, J., Pfaff, C., Schurr, U., Chetelat, R., Maumus, F., Aury, J.-M., Koren, S., Fernie,  
197 A. R., Zamir, D., Bolger, A. M., and Usadel, B. (2017). De novo assembly of a new solanum pennellii  
198 accession using nanopore sequencing. *The Plant Cell*, 29(10):2336–2348.
- 199 Shafin, K., Pesout, T., Lorig-Roach, R., Haukness, M., Olsen, H. E., Bosworth, C., Armstrong, J., Tigyi,  
200 K., Maurer, N., Koren, S., Sedlazeck, F. J., Marschall, T., Mayes, S., Costa, V., Zook, J. M., Liu, K. J.,  
201 Kilburn, D., Sorensen, M., Munson, K. M., Vollger, M. R., Eichler, E. E., Salama, S., Haussler, D.,  
202 Green, R. E., Akeson, M., Phillippy, A., Miga, K. H., Carnevali, P., Jain, M., and Paten, B. (2019).  
203 Efficient de novo assembly of eleven human genomes using promethion sequencing and a novel  
204 nanopore toolkit. *bioRxiv*.
- 205 Simão, F. A., Waterhouse, R. M., Ioannidis, P., Kriventseva, E. V., and Zdobnov, E. M. (2015). BUSCO:  
206 assessing genome assembly and annotation completeness with single-copy orthologs. *Bioinformatics*,  
207 31(19):3210–3212.
